# Supplementary material for: “What If Others Think I Look Like…” The Moderating Role of Social Physique Anxiety and Sex in the Relationship between Physical Activity and Life Satisfaction in Swiss Adolescents
Source: MDPI journal article supplement (doi:10.3390/ijerph20054441), 2023-03-02
Supplement: s1 [file s1]

### Supplemental Material

**Table S1.** Longitudinal conditional process model with life satisfaction at follow-up as dependent variable, baseline physical activity as predictor, and baseline social physique anxiety and sex as moderators.

| Sample 2: Complete data<br>at baseline and follow-up ( <i>N</i> = 864) |                       |           |          |          |
|------------------------------------------------------------------------|-----------------------|-----------|----------|----------|
| Variable                                                               | <i>b</i>              | <i>SE</i> | <i>t</i> | <i>P</i> |
| Intercept                                                              | 2.226                 | 0.535     | 4.161    | <.001    |
| PA                                                                     | 0.026                 | 0.019     | 1.391    | .161     |
| Social physique anxiety                                                | -0.081                | 0.073     | -1.108   | .268     |
| Sex (boys = 1, girls = 0)                                              | -0.090                | 0.077     | -1.175   | .240     |
| Life satisfaction                                                      | 0.470                 | 0.031     | 15.113   | <.001    |
| Age                                                                    | 0.036                 | 0.026     | 1.393    | .164     |
| BMI                                                                    | -0.008                | 0.012     | -0.679   | .498     |
| Group (intervention = 1, control = 0)                                  | -0.231                | .067      | -3.423   | <.001    |
| Familys fiancial situation                                             | .008                  | .0454     | 0.182    | .856     |
| PA × SPA                                                               | -0.053                | 0.021     | -2.506   | .012     |
| PA × Sex                                                               | -0.011                | 0.024     | -0.448   | .654     |
| SPA × Sex                                                              | -0.128                | 0.101     | -1.271   | .204     |
| PA × SPA × Sex                                                         | 0.079                 | 0.032     | 2.467    | .014     |
| <i>R</i> <sup>2</sup>                                                  | .279                  |           |          |          |
| <i>F</i>                                                               | 27.378 <sup>***</sup> |           |          |          |
